# Supplementary material for: B 2 C 9 as a high-performance Li-ion battery anode: effects of boron-incorporation and strain-engineering on the adsorption and diffusion of lithium
Source: Royal Society of Chemistry journal article supplement (doi:10.1039/d5cp03552j), 2025-12-04
Supplement: d5cp03552j1.pdf [file d5cp03552j1.pdf]

## Supporting information

### **B<sub>2</sub>C<sub>9</sub> as the High-performance Li-ion Battery Anode: Effects of Boron-incorporation and Strain-engineering on the Adsorption and Diffusion of Lithium**

Rui Shen <sup>a</sup>, Hao Cheng <sup>a</sup>, Guo-Xiang Gao <sup>a</sup>, Xin-Yue Li <sup>a</sup>, Chun-Sheng Liu <sup>b,\*</sup>, and Xiao-Juan Ye <sup>a,\*</sup>

<sup>a</sup> College of Circuit Science and Engineering, Nanjing University of Posts and Telecommunications, Nanjing 210023, China

<sup>b</sup> College of Electronic and Optical Engineering, Nanjing University of Posts and Telecommunications, Nanjing 210023, China

Corresponding author: [cslu@njupt.edu.cn](mailto:cslu@njupt.edu.cn), [yexj@njupt.edu.cn](mailto:yexj@njupt.edu.cn)

We quantified transport in the 2D DP framework using (i) band-edge parabolic fits for effective masses, (ii) band-edge energy shifts under biaxial strain for deformation-potential constants  $E_1$ , and (iii) energy-strain fitting for the 2D elastic modulus  $C_{2D}$ . From these, we obtained carrier mobilities of Li adsorbed B<sub>2</sub>C<sub>9</sub> monolayer.

Effective mass at the band edge  $k_0$ :

$$m^* = \frac{\hbar^2}{\left. \frac{d^2 E}{dk^2} \right|_{k=k_0}}$$

Mobility (2D DP model):

$$\mu = \frac{e \hbar^3 C_{2D}}{k_B T m^* m_d E_1^2}$$

$$m_n^* = 0.69 m_0, \quad m_p^* = 0.88 m_0;$$

$$\mu_n \approx 1.03 \times 10^4 \text{ cm}^2/(\text{V} \cdot \text{s}), \mu_p \approx 2.26 \times 10^4 \text{ cm}^2/(\text{V} \cdot \text{s}).$$
